# Supplementary material
Source: PubMed Central journal article supplement (PMC2740596)

## Supplementary Data:

TABLE S1. **Oligonucleotide primers used for amplification of AMP cDNAs by real-time PCR**

TABLE S2. **Mass spectrometry identification of plasma proteins after injection of proHP6 and *M. luteus* (HP6 bands) or injection of activated HP8 (HP8 bands).**

FIGURE S1. **Alignment of the amino acid sequences of serine proteinase domains of the clip domain proteinases analyzed in Fig. 1.** The accession numbers for the protein sequences are given in Experimental Procedures.

FIGURE S2. **Analysis of HP6 and HP8 mRNA (A) and protein (B) levels in *M. sexta* larvae by RT-PCR and immunoblotting.** (A) RT-PCR analysis of HP6 and HP8 transcripts. Total RNA samples from hemocytes or fat body collected at 24 h after injection with water, *E. coli*, *M. luteus*, or curdlan were isolated for RT-PCR and analyzed by 1.0% agarose gel electrophoresis. *M. sexta* ribosomal protein S3 (rpS3) was used as an internal standard to normalize the templates. (B) Immunoblot analysis of HP6 and HP8 protein levels in plasma. Cell-free hemolymph samples (1  $\mu$ l/lane) collected from *M. sexta* larvae at 24 h after injection of water, *E. coli*, *M. luteus*, or curdlan were subjected to 10% SDS-PAGE followed by immunoblot analysis using 1:2000 diluted antiserum against *M. sexta* HP6 (*left panel*) or HP8 (*right panel*) as the first antibody. Molecular masses and positions of the protein standards are marked on the *left*.

FIGURE S3. **Effect of recombinant HP6 and HP8 on plasma proPO activation in the absence of bacteria.** Samples of plasma (3  $\mu$ l) were left untreated or mixed with combinations indicated of proHP6, proHP6<sub>I</sub>, bovine Factor Xa, and proHP8. After incubation at room temperature for 10 min, PO activity was assayed using dopamine as a substrate, as described in Experimental Procedures. The bars represent mean  $\pm$  S.D. (n=3). Bars labeled with different letters are significantly different (analysis of variance and Newman-Keuls test, P < 0.05).

TABLE S1 Specific primers used in real-time PCR for antimicrobial genes

| Gene            | ID       | Forward primer                | Reverse primer                 |
|-----------------|----------|-------------------------------|--------------------------------|
| <i>moricin</i>  | AY232301 | 5'-TGCTTTCTTTAACCTTTGTCCTC-3' | 5'-TATTCTAACACAGCCTATAATGCG-3' |
| <i>cecropin</i> | BI262670 | 5'-CCGTGTTTTATTCTTCGTCTTC-3'  | 5'-AATCCTTTGACCTGCACCC-3'      |
| <i>attacin</i>  | BI262533 | 5'-CGTGTGCGAACTTCTTAAAGCC-3'  | 5'-CCTCTTCCACAACAACC-3'        |
| <i>lysozyme</i> | S71028   | 5'-GTGTGCCTCGTGGAGAATG-3'     | 5'-ATGCCTTGGTGATGTCGTC-3'      |
| <i>gloverin</i> | AM293324 | 5'-GCAAGTCGGCAACAATGG-3'      | 5'-ACCCTGTCTGTCAGTTTG-3'       |
| <i>rpS3</i>     | U12708   | 5'-TGCGTTTCATCATGGAGTC-3'     | 5'-TCCTTGCCTGAGAAGTACG-3'      |

TABLE S2 Mass spectrometry identification of plasma proteins induced after injection of HP6 or HP8

| <b>Band</b> | <b>Protein</b>                 | <b>Accession #</b> | <b>Mascot Score</b> | <b>MSMS Peptides matched</b> | <b>% coverage by MSMS</b> | <b>Protein Mass(Da)</b> |
|-------------|--------------------------------|--------------------|---------------------|------------------------------|---------------------------|-------------------------|
| HP6-1       | attacin-1                      | gi 67906420        | 332                 | 4                            | 22                        | 24289                   |
| HP6-2       | attacin-2                      | gi 29469969        | 197                 | 2                            | 14                        | 22137                   |
| HP6-2       | immune-induced protein 1(Ild1) | gi 27733419        | 173                 | 2                            | 15                        | 18195                   |
| HP6-3       | lysozyme                       | gi 233964          | 221                 | 5                            | 33                        | 14431                   |
| HP6-4       | gloverin                       | gi 29469967        | 755                 | 7                            | 56                        | 18433                   |
| HP6-5       | cecropin B                     | Contig 2488*       | 105                 | 2                            | 65                        | 3254                    |
| HP6-5       | cecropin A                     | Contig 5774*       | 141                 | 2                            | 71                        | 2875                    |
| HP8-1       | attacin-1                      | gi 67906420        | 331                 | 5                            | 20                        | 24289                   |
| HP8-2       | gloverin                       | gi 29469967        | 229                 | 4                            | 29                        | 18547                   |
| HP8-3       | cecropin B                     | Contig 2488*       | 111                 | 2                            | 65                        | 3254                    |
| HP8-3       | cecropin A                     | Contig 5774*       | 98                  | 2                            | 71                        | 2875                    |

\* *M. sexta* cecropin A and B sequences are partial sequences obtained from *M. sexta* ESTs available at <http://entopl.okstate.edu/profiles/7231contigs.pdf>.

Fig. S1

```

Manduca_HP8      RIVGGIQTEIDEHPWMLLRDYK-----PSGWGFYCGGVLISSKYVLTAAHCVK-GSDLP-PNWKLSQVRLGEWNTSSQ- 72
Bombyx_BAEEase  RIFGGIQTEIDEHPWMLLRDYK-----PLGWGFYCGGVLIAPMYVLTAAHCVK-GSDLP-SSWQLSQVRLGEWNTSTE- 72
Tenebrio_SPE    RYYGGEKTDLDEFPMALVEYEKP----GSRGFYCGGVLIISKRYVLTAAHCVK-GKDLP-KTWKLVSVRLGEYNTETD- 73
Drosophila_Easter RYGGMKTKIDEFPWMLIEYTKSQ---GKK-GHHCGGSLISTRVITASHCVN-GKALP-TDWRLSGVRLGEWDTNTN- 73
Drosophila_SPE  RIFGGTNTLWFEFPWMLLQYKLF---SETYTFNCGGALLNSRYVLTAGHCLA-SRELDKSGAVLHVSRLGEWDTRTD- 75
Manduca_PAP1    RIYGGQITDLDEFPMALLGYLTR----TGSTTYQCGGVLINQRYVLTAAHCTI-GAVER-EVGKLIIVRLGEYDTQNS- 73
Holotrichia_PPAF1 KILNGDDTVPEEFPWTAMIGYKNS----SNFEQFACGGSLINNRYIVTAAHCVA-GRVLR-VVGALNKVRLGEWNTATD- 73
Holotrichia_PPAF3 KVLGGEDTDLGEYPMALLQQTKT----SGAKSFCGGSLISDRYVLTAAHCVV-SSSYT-VT----MVRLGEWDLRAT- 69
Manduca_PAP2    KILGGEATAIDQYPWLALIEYHKL-----AEIKLMCGGSLISAKYVLTAAHCVK-GPILE--KGTPKNVRLGEYNTTNG 72
Bombyx_PPAAE   KIVGGAPASIDSYPWLVIIEYVRL-----ERTMLLCGGALISGKYVLTAGHCVK-GGILD--VGTPKTVRLGEYNTTNG 72
Manduca_PAP3    KIIGGNATDQYVWLTIIEYVKT-----GPIKLLCGGVLIISKYVLTAGHCLT-GPVLQ--IGTPTNVRLGEYNTKNDG 72
Drosophila_Grass RVSNGYEVKLSSRPWMLLRQYF-----GESRFLCGGAMISERYILTAAHCVA-GLQND-----LYEIRLGEHRISTE- 68
Limulus_PCE     RIIGGREAPIGAWPMTAVYIKQG-----GIRSVQCGGALVTRNHVITASHCVVNSAGTDVMPADVFSVRLGEHNLST- 74
Manduca_HP6     HILGGEASLGEFPHMVALGFD----NGGGEYRFDCCGSLISNYVLTAAHCIDTADREP-----PSVVRAGVVNIG-GP 70
Drosophila_PSh  HIVGGYPVDPGVYPHMAAIGYI----TFGTDFR--CGGSLIASRFVLTAAHCNT-DANT-----PAFVRLGAVNIE-NP 67
Drosophila_Snake LIVGGTPTRHGLFPHMAALGWTQGSQKQDIKWGCGGALVSELYVLTAAHCADL-GSKP-----PDMVRLGARQLN-ET 73
Drosophila_Spirit SVVGGMPTRPREFFPMAALGWR---SNFDQRIYYRCGGALIANNFVLTAAHCADL-GGEP-----PDMVRLGGDNLT-LT 69
Manduca_HP21    LIIGGMNASRNEFPHMALLGYG---EEP-DVQWLCGGTLISENFILTAGHCISSRDIN-----LTYVYLGA-LARSEV 68
Tenebrio_SAE    LIVGGTNATRKEFPHMAVIGFE----PQPGDIKWLCGGTVLSKHYILTAAHCLSHQEHGR-----ARYVRIG--VTDLED 69
      : . * . * :                *** :: :. : * . * * :                : *

Manduca_HP8      VDCVGD-----DCSQ-PVQDIRIEQIVAHESYDPEDNNQNDIALLRLAQNVHLNDFVKPICLPTTEDLRDSNFDGLE 144
Bombyx_BAEEase  TDCVEG-----DCSG-PVQDIPVQQIIAHENYDPNDKQNDIALLRLSRNAQFNDFVSPICLPTSNELRQNEFESDY 144
Tenebrio_SPE    TDCINNGF--G-EDCAP-PPVNVQVEARIAHESYEPNNINQYHDIALLRRLREVKFSYDIKPICLPTTTEELSKSYLGQK 149
Drosophila_Easter PDCEVDVR--GMKDCA-PHLDVPVERTIPHPDYIPASKNQVNDIALLRLAQQVEYTDVFRPICLPLDVNLRSATFDGIT 150
Drosophila_SPE  PDCTTQMN--GQRICAP-KHIDIEVEKGIHEMYAPNSVDQRNDIALVRLKRIVSYTDYVRPICLPTDG-LVQNNFVDYG 151
Manduca_PAP1    VDCVD-----DVCAD-PPQNIPIEVAYPHSGYSDNNKNRKDDIALVRLTRRAQYTYVVKPICLANNN--ERLATGND 142
Holotrichia_PPAF1 PDCYG----AVRVCVPDKPIDLGIETIQHPDYVDGSKDRYHDIALIRLNQVEFTNYIRPVCLPQP---EEVQVQR 145
Holotrichia_PPAF3 QDCVGS--SYQYCSF-PPQDIGIESITSHPNYKSSRGVFNIDIALIRLARPNRKNYVQPICLPLPT---ERTPVGEN 142
Manduca_PAP2    PDCVPSDA--GSQDCTE-GMVLAPIEQTIHPKYPYSLNKQHDIALIRLRTFAPRTDFISPICLPKID-YAQSPPSAFS 148
Bombyx_PPAAE   RDCVSVSA--GGTDCD-PLVKIGIEKTIHPHPDYQYHFLRKHDIGLIRLQSIAPFTDFIRIPICLPLST-YTVNPPSKFA 148
Manduca_PAP3    ADCVTVEA--GGMDCTE-GAVIVPIEKTIPHEYPNISRTRNDIGLIRLKEMAPFTDFIRIPICLPLSD-LTQAPVNF 148
Drosophila_Grass EDCRQ---GRKKKCAP-PPVNVGIEKHLIHEKYDAR--HIMHDIALLLKLNRSVPFQKHKIPICLPITDELKEKAEQIST 144
Limulus_PCE     -----DDDSNP-IDFAVTSVKHHEHFVLTAT---YLNDAIALLTNDTVFTDRIRPICLPHYRK-LRYDDLAMRK 137
Manduca_HP6     AWDDDET-----DYRVAETILHPNYTRR--EKYHDVALLRLDRPVQFSSTLNAVCLFSSN---ENP--TSK 128
Drosophila_PSh  DHSYQ-----DIVIRSVKIHPQYVG--NKNYDIAILELERDVVETDNIRPACLHTDA---TDPPSNSK 125
Drosophila_Snake SATQQ-----DIKILIIVLHPKYRSS--AYYHDIALKLTRRVKFSEQVRPAQLWQLP---ELQ--IPT 120
Drosophila_Spirit EG--E-----DISIRRVIIHPDYSAS--TAYNDIALLELETAAP--ELKPTCIWTK---EVT--NTL 122
Manduca_HP21    TDPSK-----QYRIKKIKHKEPFAPP--VRYNDIALVELERNVPLDEWLKPACLHMGD---ETA--DDR 125
Tenebrio_SAE    TNHRQ-----QLEVEELIPYPEYKSS--SHYHDIGLLRLKRSAKLDSFTVPACLYRKH---DIE--AEK 126
      :                . * . : . * :

Manduca_HP8      MEVAGWG-----KTETRTESDVKLVKVRVPPVSRRLCKSV-----YERVERLITDKQLCAGGVEG-KDSCRGDSGG 208
Bombyx_BAEEase  MEVAGWG-----KTETRSESDVKLVKVRVIVNREECANV-----YSNVDRRVTKQICAGGLAG-RDSCRGDSGG 208
Tenebrio_SPE    LFVAGWG-----KTENRSESNIKLVQVPVKQMSDCTAT-----YSSANVRLGSGQLCAGGESG-KDSCRGDSGG 213
Drosophila_Easter MDVAGWG-----KTEQLSASNLKKAAVEGFMRDECQNV-----YSSQDILLEDTQMCAGGKEG-VDSCRGDSGG 214
Drosophila_SPE  MDVAGWG-----LTENMQPSAIKLIKITVNVWNLTSQEK-----YSSFVKLDDSQMCAGGQLG-VDTCCGDSGG 215
Manduca_PAP1    VFVAGWG-----KTLSGKSSPIKLLKGMPIFDKSDCASK-----YRNLGAELTDKQICAGGVFA-KDTCRGDSGG 206
Holotrichia_PPAF1 LTVVWG-----RTETGQYSTIKQKLAVPVVAEQCAKT-----FGAAGVVRSSQLCAGGEKA-KDSCGGDSGG 209
Holotrichia_PPAF3 LLVAGWG-----ATETKAQSDKKQKLLKLPVTDLPACKTL-----YAKHNIINDKMICAGGLKG-KDSCGGDSGG 206
Manduca_PAP2    LYVAGWGRYIQDVEAGIYRSSKIKLHVNVFPVDNERCLGGVRKL-----RNGENISLWKGQLCAGGVSG-KDSCGGDSGG 222
Bombyx_PPAAE   LTVAGWGRYLQ-FDNGTVRSSKIKLHVTLFPVQRDVCEANQKPL-----RNGQRITLWKGQMCAGGEAG-KDSCGGDSGG 221
Manduca_PAP3    LYAAGWG----AVSTSQPSNVKLVHQLPFIISYERCQPS-YAV-----QNRQ-IELWEKQVCAGGEAG-KDSCGGDSGG 215
Drosophila_Grass YFVTGWG-----TTENGSSSDVLLQANVLPQPRASCSQA-----YRRAVPLS--QLCVGGDL-QDSCGGDSGG 205
Limulus_PCE     PFITGWG----TTAFNGPSSAVLREVQLPIWEHEACRQA-----YEKDLNITNVYMCAGFADGGKDACQGDSSG 202
Manduca_HP6     LTIITGWG----RTSNTRDIKSSKLLKADVVVPSDKCGESYTN---WRKLPHGISE--MMCAGDPKGVDRDTCQGDSSG 198
Drosophila_PSh  FVAVAGWG----VLNVTRRSKILLRAGLELDVVPDQCNISYAEQPGSIRLLKQGVDS--LLCAIDQLIADACKQGDSSG 199
Drosophila_Snake VVAAGWG----RTEFLG-AKSNALRQVLDVVPDQMTCKQIYRKERR----LPRGIEG--QFCAGYLPGGRDTCQGDSSG 189
Drosophila_Spirit VTAIGYG----QTSFAG-LSSAQLLVPLKSVSNEBECQHYYQKQDQ----LAQGVLTG--QMCAGDITGERDTCQGDSSG 190
Manduca_HP21    VWATGWG----LTEYKASSGANILQKVVLNKFSFECILQYP----PHRLMSQGLDVNSQMCYGDSDTCQGDSSG 196
Tenebrio_SAE    AIATGWG----HTTWGGS-GSNLLKVTLDLDFDHASCNRSYKNQI---SRRLKDGIIIDDIQVCAGSLDDEKDTCCQGDSSG 199
      * * * : . : *                . *                * * * * *

```

# Fig. S1

|                   |                                                                                                                                                    |     |
|-------------------|----------------------------------------------------------------------------------------------------------------------------------------------------|-----|
| Manduca_HP8       | ALMGQAPSA-NN----WLVVGVVSYGSPSPCGTPGWPGVYTRVGAFMDWILSKLRP-----                                                                                      | 258 |
| Bombyx_BAEEase    | ALMGQSPKA-NN----WYVFGVVSYGSPSPCGTEGWPGVYTRVGSFMDWILSKLEQ-----                                                                                      | 258 |
| Tenebrio_SPE      | PLMILSLDK-DKDI-HWYAAGVVSYGSPSPCGMANWPGVYTKVSKYVDWIVGKLRP-----                                                                                      | 266 |
| Drosophila_Easter | PLIGLDTNK-VNTY--YFLAGVVSFGPTPCGLAGWPGVYTLVGKYVDWIQNTIES-----                                                                                       | 266 |
| Drosophila_SPE    | PLMVPISTG-GRDV--FYIAGVTSYGTKPCGLKGWPGVYTRTGAFIDWIKQKLEP-----                                                                                       | 267 |
| Manduca_PAP1      | PLMQRR-----PEG-IWEVVGIVSFG-NRCGLDGWPGVYSSVAGYSDWILSTLRSTNV-----                                                                                    | 257 |
| Holotrichia_PPAF1 | PLLAER-----ANQ-QFFLEGLVSFG-ATCGTEGWPGIYTKVGKYRDWIEGNIRP-----                                                                                       | 257 |
| Holotrichia_PPAF3 | PLFGQTG---AGNA-QFYIEGIVSYG-AICGTEGFPAIYTRVSDHLDWIKQNVRV-----                                                                                       | 256 |
| Manduca_PAP2      | PLMYDKE-----R-KYEAVGVVSYGAEICGQQGIPGVYTNVHEYLPWIKATIKA-----                                                                                        | 270 |
| Bombyx_PPAAE      | PLMYEHS-----K-KYEAVGIVSFGPEKCGQIDIPGVYTNVYEYLPWIQNTIEP-----                                                                                        | 269 |
| Manduca_PAP3      | PLMYENG-----Q-TYEIVIGIVSFGPTPCGMQDIPGVYTKVHSYKDWIISNIKP-----                                                                                       | 263 |
| Drosophila_Grass  | PLQAPAQYLGEYAP-KMVEFGIVSQGVVTCGQISLPLGLYTNVGEYVQWITDTMASNGL-----                                                                                   | 260 |
| Limulus_PCE       | PMMLPVKTG-----EFYLIGIVSFG-KKCALPGFPGVYTKVTEFLDWIAEHMV-----                                                                                         | 249 |
| Manduca_HP6       | PL----QLMEKDG--LYRLVGIVTSFGRGCGS--YVPGVYTRVSNYLGWIESIVWPN-----                                                                                     | 246 |
| Drosophila_PSh    | PL--IHELNVEDG--MYTIMGVISGFGFCAT--VTPGLYTRVSSYLDIEGIVWPDNRV-----                                                                                    | 252 |
| Drosophila_Snake  | PI---HALLPEYNC-VAFVVGIVTSFGKFCAAP-NAPGVYTRLYSYLDWIEKIAFKQH-----                                                                                    | 251 |
| Drosophila_Spirit | P-----LLMQDGL-LGYVVGIVTSFGQGCAS--GPPSVYTRVSSFVDWIEGIVWPAQQVQVTNAPQPNQMTSFSPEFDLRATI                                                                | 262 |
| Manduca_HP21      | PLQIKH--KKINC--MWLIIGVTSFGKACGFI-GEPIYTKVSHYIPWIESVWVP-----                                                                                        | 246 |
| Tenebrio_SAE      | PLQIFHESKDIKC--MYDIIIGVTSFG-----PGVYVRVSYQYIGWIEDIVWPENS-----                                                                                      | 246 |
|                   | . <span style="margin-left: 100px;">* : * *</span> <span style="margin-left: 100px;">* : * *</span> <span style="margin-left: 100px;">. : *</span> |     |

Fig. S2

A

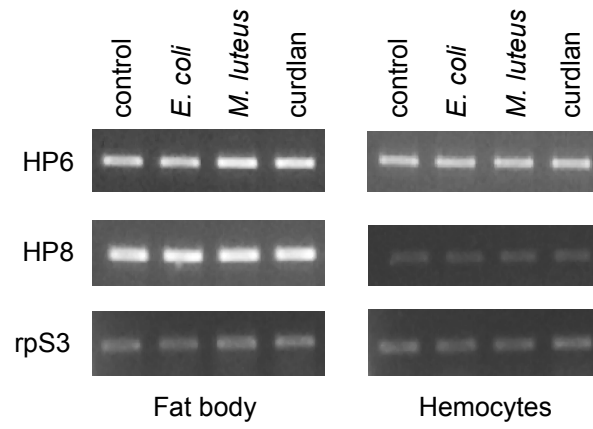

B

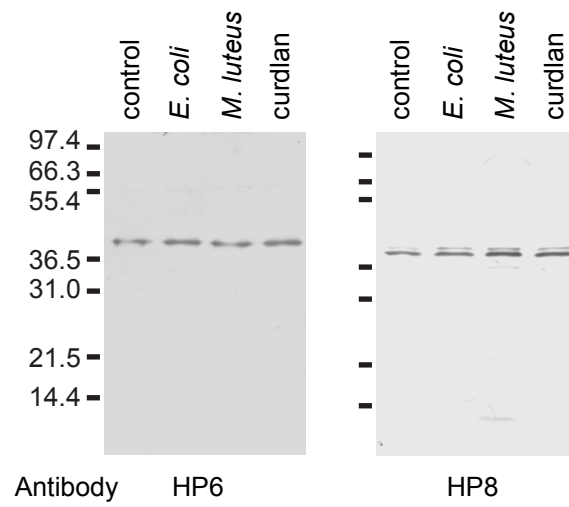

Fig. S3

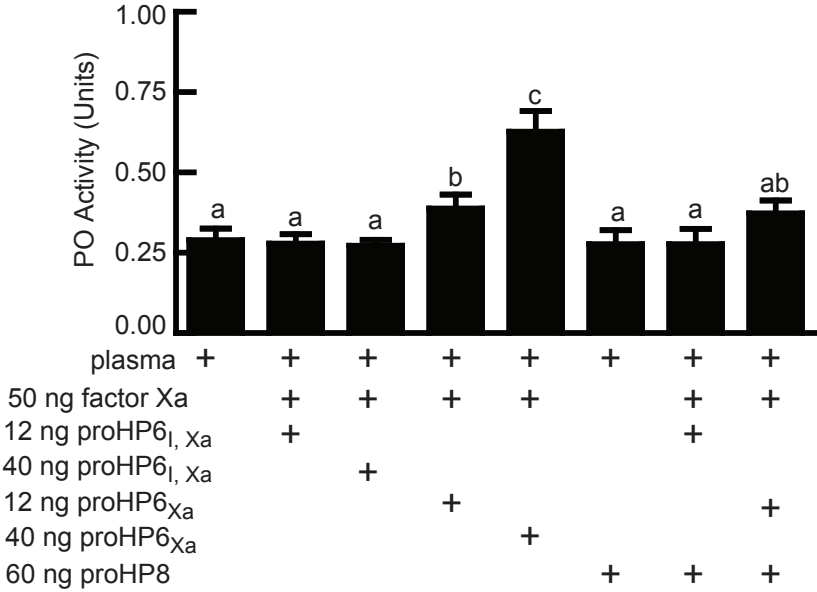

Supplement: supp_M109.007112_jbc.M109.007112-1.pdf [file supp_M109.007112_jbc.M109.007112-1.pdf]
